# Supplementary material for: In situ simulation training for a better interprofessional team performance in transferring critically ill patients with COVID-19: a prospective randomised control trial
Source: HighWire-hosted journal article supplement (doi:10.1136/postgradmedj-2021-141426), 2022-01-31
Supplement: postgradmedj-2021-141426supp004_data_supplement.pdf [file postgradmedj-2021-141426supp004_data_supplement.pdf]

**Cronbach Alpha Validation**

|                                          | <b>N</b> | <b>Mean</b>  | <b>Variance</b>                | <b>SD</b> |
|------------------------------------------|----------|--------------|--------------------------------|-----------|
| <b>Statistics for Scale</b>              | 38       | 62.2000      | 48.164                         | 6.94004   |
|                                          |          | <b>Alpha</b> | <b>Standardized Item Alpha</b> |           |
| <b>Reliability Coefficients for Item</b> |          | .819         | .811                           |           |
