# Supplementary figures and images for: In situ simulation training for a better interprofessional team performance in transferring critically ill patients with COVID-19: a prospective randomised control trial
Source: HighWire-hosted journal article supplement (doi:10.1136/postgradmedj-2021-141426), 2022-01-31

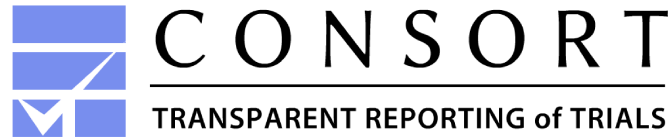

### CONSORT 2010 Flow Diagram

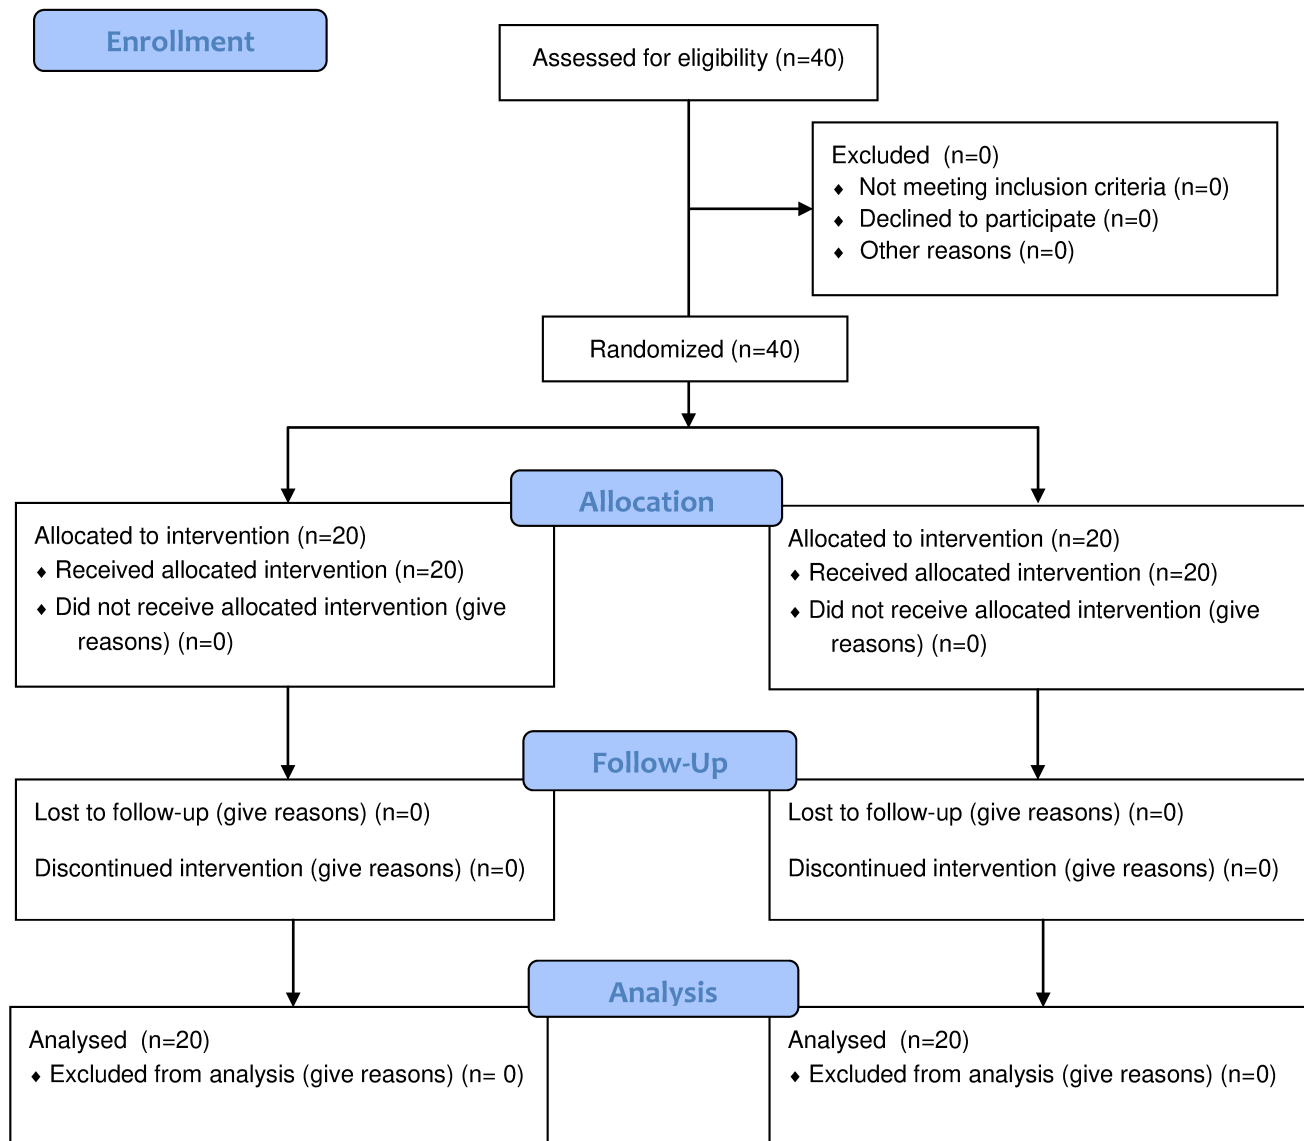

Supplement: postgradmedj-2021-141426supp002_data_supplement.pdf [file postgradmedj-2021-141426supp002_data_supplement.pdf]
